# Supplementary material for: Nanosized NiFeSe2/NiCo2O4 hierarchical arrays on Ni foam as an advanced electrocatalyst for hydrogen generation
Source: Royal Society of Chemistry journal article supplement (doi:10.1039/d2se01196d), 2022-11-16
Supplement: d2se01196d2.pdf [file d2se01196d2.pdf]

## Supplementary Information

### Nanosized NiFeSe<sub>2</sub>/NiCo<sub>2</sub>O<sub>4</sub> hierarchical array on Ni foam as an advanced electrocatalyst for hydrogen generation

Mahboubeh Tasvirij<sup>a,\*</sup>, Sahar Shekarabi<sup>a</sup>, Davood Taherinia<sup>b,\*</sup> and Mohammad Amin Zare Pour<sup>a</sup>

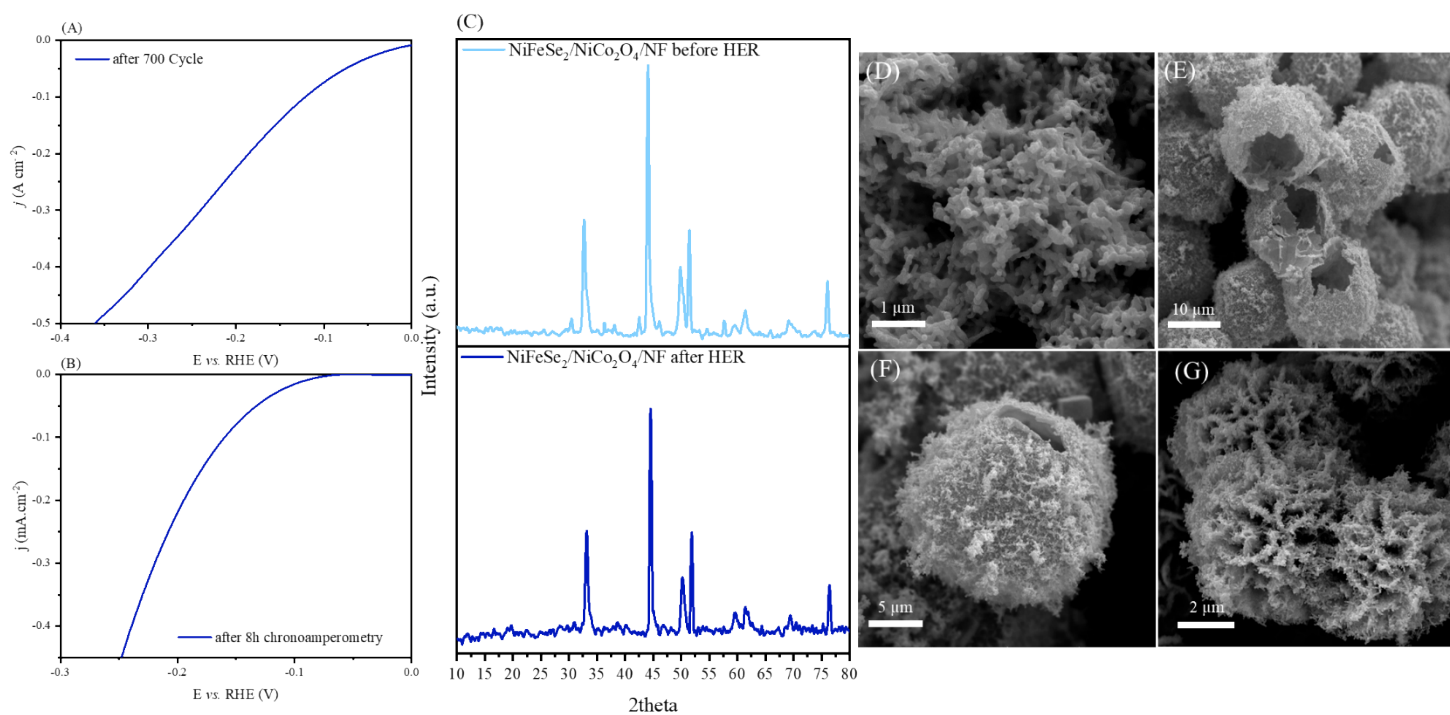

**Figure S1.** Linear sweep voltammetry (A) after 700 Cycle and (B) after 8 h chronoamperometry at the constant potential of 0.095 V (vs. RHE), (C) XRD and (D-G) SEM images of NiFeSe<sub>2</sub>/NiCo<sub>2</sub>O<sub>4</sub> on nickel foams as a post-catalytic analysis.
